# Supplementary material for: Understanding the Attitudes and Beliefs of Oncologists Regarding the Transitioning and Sharing of Survivorship Care
Source: Curr Oncol. 2021 Dec 19;28(6):5452–65. doi: 10.3390/curroncol28060454 (PMC8700375; doi:10.3390/curroncol28060454)
Supplement: Supplementary file 1 [file curroncol-28-00454-s001.zip › curroncol-1474615-supplementary.pdf]

**Question:**

This survey is designed to assess the following: of oncologists practicing at the Juravinski and Walker Family Cancer Centres, 1) how many oncologists are engaging in transitioning/sharing survivorship care with Primary Care Physicians (PCPs), 2) what are the attitudes and beliefs of oncologists regarding transitioning/sharing survivorship care with PCPs, and 3) what are any personal, patient, malignancy-specific and administrative barriers and/or facilitators to the transition/sharing of survivorship care with PCPs?

**Definitions:**

Primary Care Physician (PCP): the physician providing primary health care to your patient (ex. Family Physician).

Survivorship: the stage of a patient's experience with cancer where active therapy (ex. to induce remission) is complete, there is no evidence of active disease, and focus shifts to monitoring for recurrence, managing late and long term effects of treatment, general and psychosocial health promotion.

Sharing care: survivorship care for the patient is split between the oncologist and the PCP, assuming clear roles are delineated.

Transitioning care: survivorship care is solely under the purview of the PCP.

**Survey****Demographic and Practice Features:**

1. Type of Oncologist (check one):
  - ☐ Medical
  - ☐ Radiation
  - ☐ GPO/family physician + oncology
  - ☐ Hematologist
  - ☐ Surgical (including gynecologic oncologist)
  - ☐ Other
2. Practice setting (check one):
  - ☐ Regional Cancer Centre
  - ☐ Non-Regional Cancer Centre
  - ☐ Community Hospital
3. Oncologist funding model:
  - ☐ Fee-for service
  - ☐ Alternate Funding Program (AFP)
  - ☐ Blended model

4. Average # of new patients/week: \_\_\_\_\_

5. Years in practice:

- ☐  $\leq 5$   
☐ 6-10  
☐ 11-15  
☐ 16-20  
☐ >20

6. What percent of your professional time do you spend on the following activities in a week:

Providing patient care \_\_\_\_\_ %

(including radiation planning  
sessions, attending multi-  
disciplinary rounds, attending  
talks)

Research \_\_\_\_\_ %

Teaching \_\_\_\_\_ %

Administrative duties \_\_\_\_\_ %

Other (specify) \_\_\_\_\_ %

7. Disease site(s) in your current practice (check all that apply):

- |                                   |                                       |
|-----------------------------------|---------------------------------------|
| <input type="radio"/> Breast      | <input type="radio"/> CNS             |
| <input type="radio"/> Colon       | <input type="radio"/> GI              |
| <input type="radio"/> Skin        | <input type="radio"/> Head and neck   |
| <input type="radio"/> Prostate    | <input type="radio"/> Non-prostate GU |
| <input type="radio"/> Hematologic | <input type="radio"/> Gynecologic     |
| <input type="radio"/> Sarcoma     | <input type="radio"/> Lung            |
| <input type="radio"/> Other       |                                       |

8. If you treat more than once disease site, please choose one, and answer the rest of the survey for this disease site only. Indicate chosen disease site:

- |                                   |                                       |
|-----------------------------------|---------------------------------------|
| <input type="radio"/> Breast      | <input type="radio"/> CNS             |
| <input type="radio"/> Colon       | <input type="radio"/> GI              |
| <input type="radio"/> Skin        | <input type="radio"/> Head and neck   |
| <input type="radio"/> Prostate    | <input type="radio"/> Non-prostate GU |
| <input type="radio"/> Hematologic | <input type="radio"/> Gynecologic     |
| <input type="radio"/> Sarcoma     | <input type="radio"/> Lung            |
| <input type="radio"/> Other       |                                       |

### Attitudes and Beliefs:

1. From your clinical experience for the disease site you treat most often, in your opinion, who is best suited to provide the following survivorship care activities:

|                                             |                                     |                           |                              |
|---------------------------------------------|-------------------------------------|---------------------------|------------------------------|
| Following long term effects of treatment    | <input type="radio"/> Oncology team | <input type="radio"/> PCP | <input type="radio"/> Either |
| Surveillance for late effects of treatment  | <input type="radio"/> Oncology team | <input type="radio"/> PCP | <input type="radio"/> Either |
| Screening for new primary malignancies      | <input type="radio"/> Oncology team | <input type="radio"/> PCP | <input type="radio"/> Either |
| Surveillance for recurrence of malignancy   | <input type="radio"/> Oncology team | <input type="radio"/> PCP | <input type="radio"/> Either |
| Providing psychosocial support              | <input type="radio"/> Oncology team | <input type="radio"/> PCP | <input type="radio"/> Either |
| Treatment of patient's other co-morbidities | <input type="radio"/> Oncology team | <input type="radio"/> PCP | <input type="radio"/> Either |
| Other (Please specify: _____)               | <input type="radio"/> Oncology team | <input type="radio"/> PCP | <input type="radio"/> Either |

2. In thinking about transitioning/sharing survivorship care with PCPs, please indicate the degree to which you think the following aspects of your practice would be affected:

It would free time in your practice to spend on current patients.

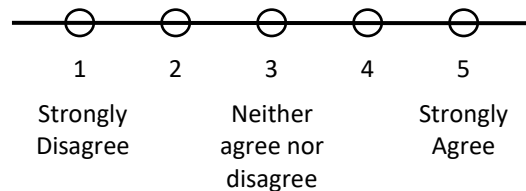

It would free time in your practice to spend on other administrative, research, or teaching responsibilities.

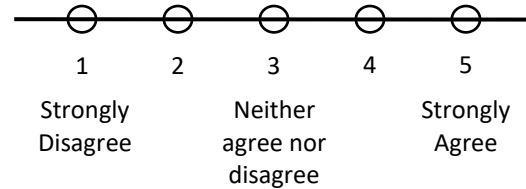

It would take additional time to assess patients for possible shared or transferred care.

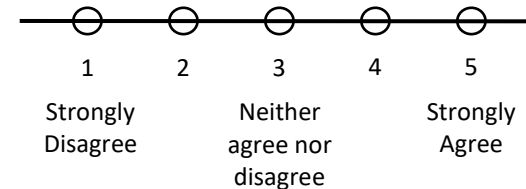

It would take more time to co-manage a given patient with their PCP.

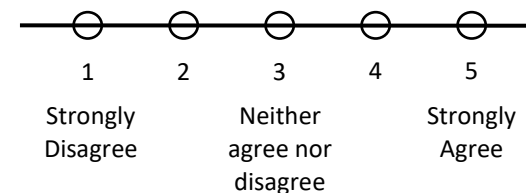

It would free time in your practice to see more new patients.

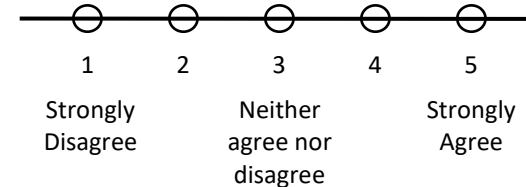

Other. Specify: \_\_\_\_\_.

1 2 3 4 5

Strongly Disagree Neither agree nor disagree Strongly Agree

Other. Specify: \_\_\_\_\_.

1 2 3 4 5

Strongly Disagree Neither agree nor disagree Strongly Agree

3. What proportion of your survivorship patient population (ex. no evidence of active disease), do you currently transition to PCPs:
- ☐ None
  - ☐ 1-10%
  - ☐ 11-20%
  - ☐ 21-30%
  - ☐ 31-40%
  - ☐ ≥41%
4. At what point in your patient's survivorship stage do you generally consider transition to PCPs:
- ☐ <1 year
  - ☐ 1 year
  - ☐ 2 years
  - ☐ 3 years
  - ☐ 4 years
  - ☐ 5 years
  - ☐ >5 years
5. If you think about your current survivorship patient population (ex. no evidence of active disease), you feel the following proportion could be reasonably transitioned to PCPs:
- ☐ None
  - ☐ 1-10%
  - ☐ 11-20%
  - ☐ 21-30%
  - ☐ 31-40%
  - ☐ ≥41%
6. If you think about your current survivorship patient population (ex. no evidence of active disease), you feel the following proportion could be reasonably shared with PCPs:
- ☐ None
  - ☐ 1-10%

- ☐ 11-20%
- ☐ 21-30%
- ☐ 31-40%
- ☐ ≥41%

### **Assessment of Barriers and Facilitators:**

Barrier: that which you perceive to impede your decision to transition patient care to a PCP

Facilitator: that which you perceive to enable your decision to transition patient care to a PCP

To what degree would the following administrative factors be barriers or facilitators to transitioning/sharing survivorship care:

Loss of remuneration for providing patient care.

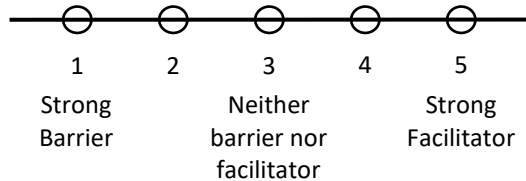

Creation of a care plan to send to the PCP.

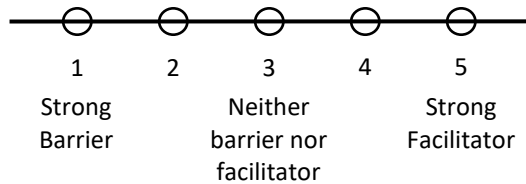

Repatriation if there is an oncology-related problem.

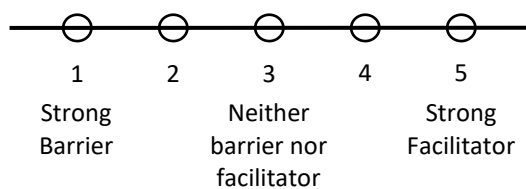

The patient is in a clinical trial.

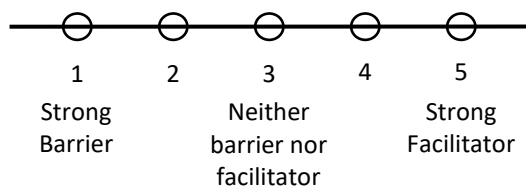

Risk of gaps in patient care.

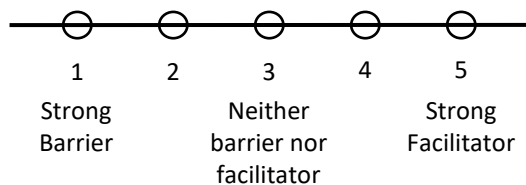

Loss of patient outcome data.

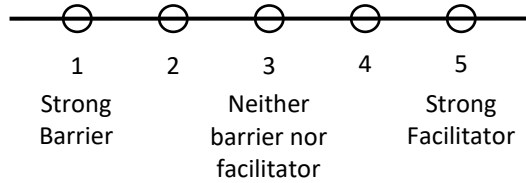

Lack of clear guidelines in your disease site regarding survivorship care.

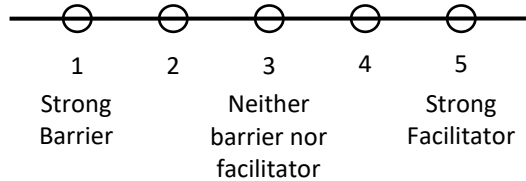

Other. Specify: \_\_\_\_\_.

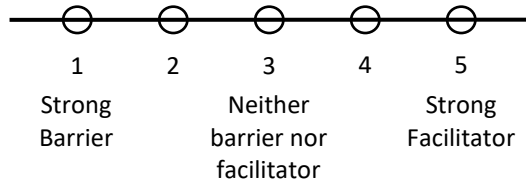

Other. Specify: \_\_\_\_\_.

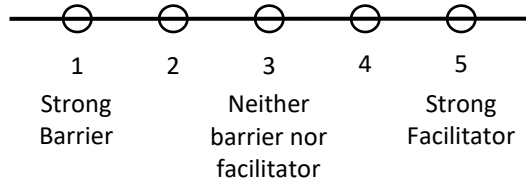

To what degree would the following personal factors be barriers or facilitators to transitioning/sharing survivorship care:

Barrier: that which you perceive to impede your decision to transition patient care to a PCP

Facilitator: that which you perceive to enable your decision to transition patient care to a PCP

You would see fewer well patients in your clinic.

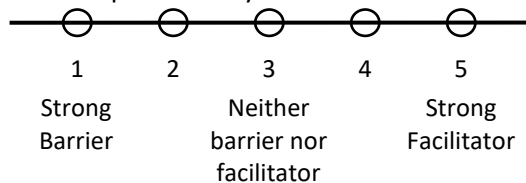

You would have fewer longitudinal relationships with patients.

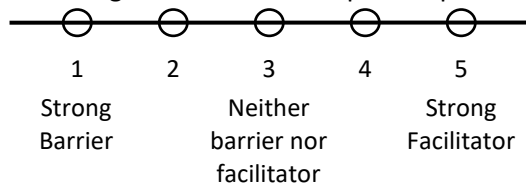

PCP ability to deal with surveillance for recurrence.

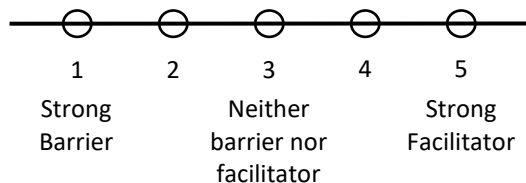

PCP ability to deal with effects of treatment.

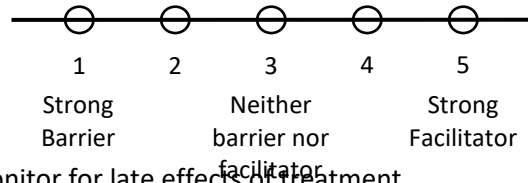

PCP ability to monitor for late effects of treatment.

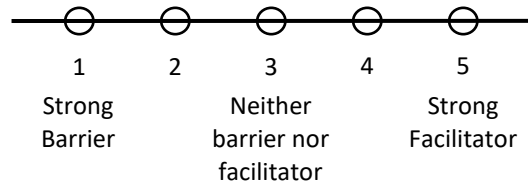

PCP ability to deal with psychosocial aspects of survivorship care.

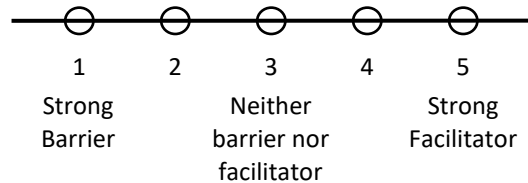

Perceived PCP willingness to provide survivorship care.

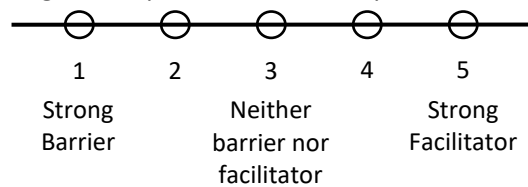

Other. Specify: \_\_\_\_\_.

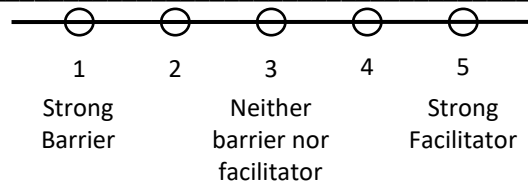

Other. Specify: \_\_\_\_\_.

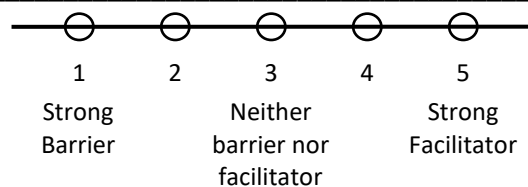

To what degree are the following patient factors barriers or facilitators to transitioning/sharing survivorship care:

Barrier: that which you perceive to impede your decision to transition patient care to a PCP

Facilitator: that which you perceive to enable your decision to transition patient care to a PCP

Patient anxiety.

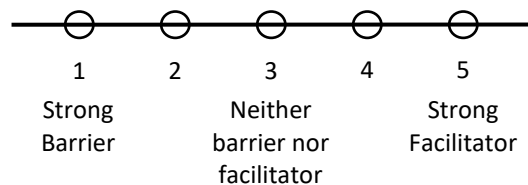

Patient access to your practice location is difficult.

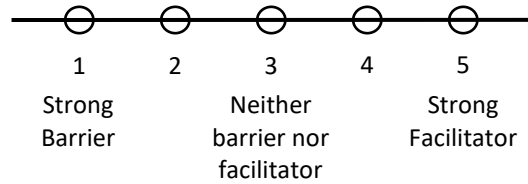

Ongoing adjuvant therapy (ex. endocrine therapy in breast cancer).

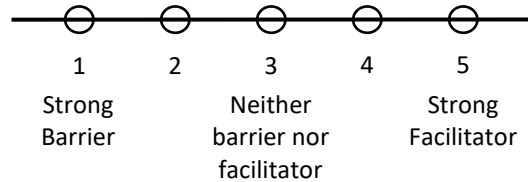

Ongoing side effects from cancer therapy.

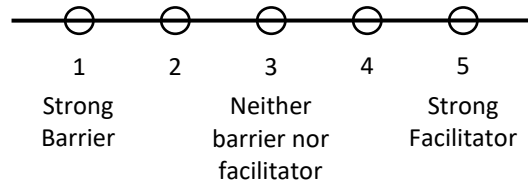

Patient has many other co-morbidities.

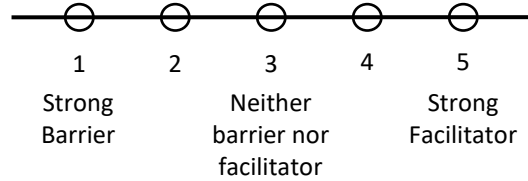

Patient is using other services at your cancer centre (ex. psychologist, social work, dietician, pain clinic, other oncology physicians).

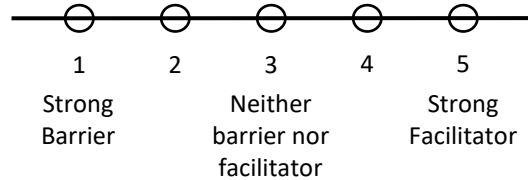

Patient does not want to transition to PCP for malignancy-related care.

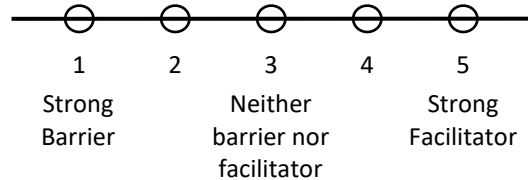

Other. Specify: \_\_\_\_\_.

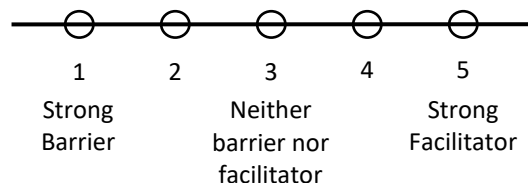

Other. Specify: \_\_\_\_\_.

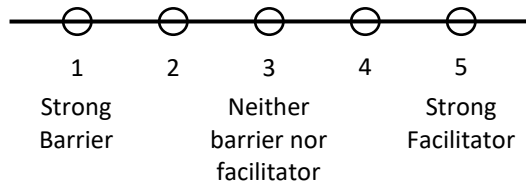

To what degree are the following disease factors barriers or facilitators to transitioning/sharing survivorship care:

Barrier: that which you perceive to impede your decision to transition patient care to a PCP

Facilitator: that which you perceive to enable your decision to transition patient care to a PCP

Low likelihood of recurrence.

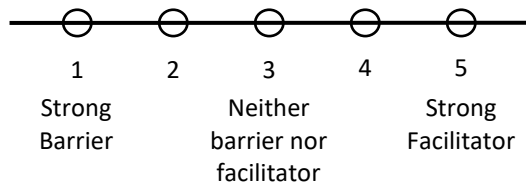

High likelihood of recurrence.

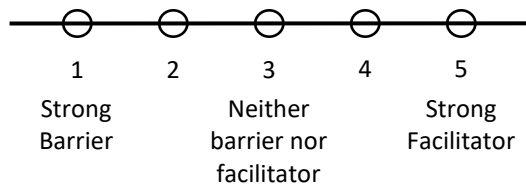

Long term sequelae of the cancer.

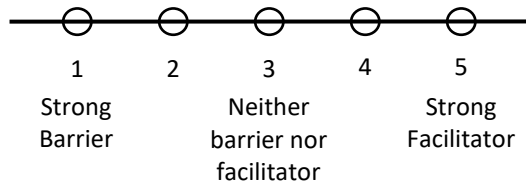

Long term sequelae of treatment for cancer.

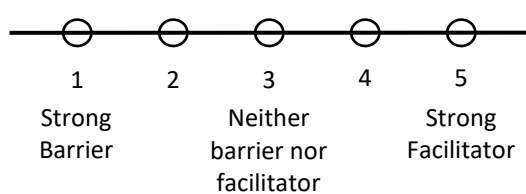

Other. Specify: \_\_\_\_\_.

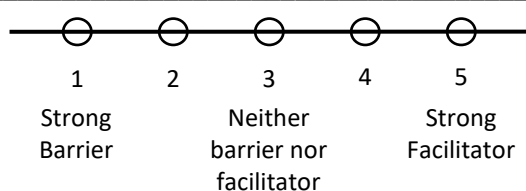

Other. Specify: \_\_\_\_\_.

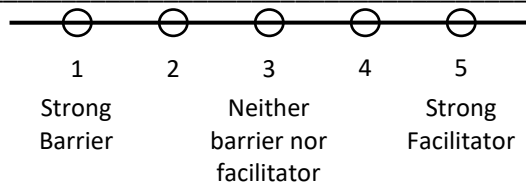

7. For the disease sites that you treat, during a patient's survivorship stage, is there any point at which you would be comfortable with transitioning to PCP-led care? Please answer this question for each disease site you treat.

☐ Yes (When? \_\_\_\_\_)

☐ No (Why not? \_\_\_\_\_)

8. Thank you for your time. We would appreciate any further feedback you have with regards to improving survivorship care. Please feel free to comment on any other issues, or other barriers or facilitators, which you feel are important, especially if you feel they have not been adequately covered by the previous survey questions.

Specify. \_\_\_\_\_

9. If you are interested in being contacted to be interviewed on the topics addressed in this survey, please click on this link. This link will bring you to a page where you can provide contact information that is separate from your survey responses. Thank you again for your time.
